# Supplementary material
Source: PubMed Central journal article supplement (PMC3145338)

*Supporting Information for*

**Using Covalent Dimers of Human Carbonic Anhydrase II as a Model for  
Bivalency in Immunoglobulins**

Eric T. Mack, Phillip W. Snyder, Raquel Perez-Castillejos, and George M. Whitesides\*

*Department of Chemistry and Chemical Biology, Harvard University*

*12 Oxford Street, Cambridge, MA 02138*

\* Correspondence: [gwhitesides@gmwgroup.harvard.edu](mailto:gwhitesides@gmwgroup.harvard.edu)

**Table of Contents**

|                                                                                        |      |
|----------------------------------------------------------------------------------------|------|
| Calculation of the number of ligands accessible to (CA) <sub>2</sub> 's on the surface | pg 2 |
| Derivation of equation 13                                                              | pg 2 |
| Scheme S1                                                                              | pg 4 |

### Calculation of the number of ligands accessible to (CA)<sub>2</sub>'s on the surface.

The maximum number of ligands accessible to the binding sites of (CA)<sub>2</sub> is the number of ligands found in a circle of the SAM with a radius equal to the distance between the binding sites of (CA)<sub>2</sub>. The minimum distance between the binding sites of (CA)<sub>2</sub> (4.2 nm) is twice the radius of CA (2.1 nm). The number of lattice sites,  $n$ , covered by a molecule of radius  $r$ , adsorbed on a hexagonal lattice characterized by a lattice vector of length  $a$ , is given by eq S1 in which  $k = r_{\text{protein}} / a$ . For (CA)<sub>2</sub> adsorbed on the SAM having lattice sites arranged on a hexagonal lattice,  $a = 0.5$  nm and  $r_{\text{protein}} = 4.2$  nm (i.e.,  $k = 4.2 \text{ nm} / 0.5 \text{ nm} = 8.4$ ) yield  $n \sim 238$  (eq S1).<sup>1</sup>

$$n = 3k(k + 1) + 1 \quad (\text{S1})$$

Roughly 5 are the ligands accessible to (CA)<sub>2</sub>, which results from multiplying  $n$  by the mole fraction—that is, 238 lattice sites per CA dimer \* 0.02 ligands per lattice site ~ 5 ligands per CA dimer.

(1) Stankowski, S. *Biochim. Biophys. Acta* **1984**, 777, 167-182.

### Derivation of Equation 13

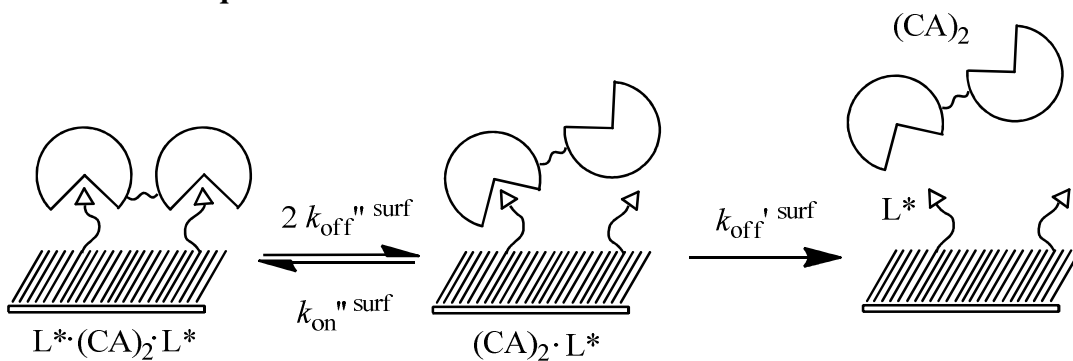

The rate of dissociation of (CA)<sub>2</sub> from the SAM is described by three differential equations (eq S2-S4).

$$\frac{d[L^* \cdot (CA)_2 \cdot L^*]}{dt} = -2k_{\text{off}}'' \text{ surf} [L^* \cdot (CA)_2 \cdot L^*] + k_{\text{on}}'' \text{ surf} [(CA)_2 \cdot L^*] \quad (\text{S2})$$

$$\frac{d[(CA)_2 \cdot L^*]}{d t} = 2k_{\text{off}}''^{\text{surf}} [L^* \cdot (CA)_2 \cdot L^*] - k_{\text{on}}''^{\text{surf}} [(CA)_2 \cdot L^*] - k_{\text{off}}'{}^{\text{surf}} [(CA)_2 \cdot L^*] \quad (\text{S3})$$

$$\frac{d[(CA)_2]}{d t} = k_{\text{off}}'{}^{\text{surf}} [(CA)_2 \cdot L^*] \quad (\text{S4})$$

Application of the steady state approximation to  $[CA_2 \cdot L^*]$ .

$$\frac{d[(CA)_2 \cdot L^*]}{d t} = 0 \quad (\text{S5})$$

Then solving equation S3 for  $[CA_2 \cdot L^*]$

$$[(CA)_2 \cdot L^*]^* = \frac{2k_{\text{off}}''^{\text{surf}} [L^* \cdot (CA)_2 \cdot L^*]}{k_{\text{on}}''^{\text{surf}} + k_{\text{off}}'{}^{\text{surf}}} \quad (\text{S6})$$

The signal in response units (RU) is proportional to concentration of  $(CA)_2$  in solution.

$$\frac{dRU}{d t} = -\frac{d[(CA)_2]}{d t} = -k_{\text{off}}'{}^{\text{surf}} [(CA)_2 \cdot L^*] \quad (\text{S7})$$

Substitution of equation S6 into S7 yields equation S8.

$$-\frac{d[(CA)_2]}{d t} = -k_{\text{off}}'{}^{\text{surf}} \frac{2k_{\text{off}}''^{\text{surf}} [L^* \cdot (CA)_2 \cdot L^*]}{k_{\text{on}}''^{\text{surf}} + k_{\text{off}}'{}^{\text{surf}}} \quad (\text{S8})$$

The observed rate constant  $k_{\text{off}}^{\text{avidity,surf}}$  is equal to function of rate constants in S8 (eq S9).

$$k_{\text{off}}^{\text{avidity,surf}} = \frac{k_{\text{off}}'{}^{\text{surf}} 2k_{\text{off}}''^{\text{surf}}}{k_{\text{on}}''^{\text{surf}} + k_{\text{off}}'{}^{\text{surf}}} \quad (\text{S9})$$

When  $k_{\text{on}}''^{\text{surf}} \gg k_{\text{off}}'{}^{\text{surf}}$  the denominator becomes  $k_{\text{on}}''^{\text{surf}}$ . Replacing the ratio of  $k_{\text{off}}'{}^{\text{surf}}$  to  $k_{\text{on}}''^{\text{surf}}$  by  $K_d''^{\text{surf}}$  according to the definition  $K_d = k_{\text{off}}' / k_{\text{on}}''$  yields eq S10, which corresponds to equation 13 of the main text.

$$k_{\text{off}}^{\text{avidity,surf}} \approx 2 K_d''^{\text{surf}} k_{\text{off}}'{}^{\text{surf}} \quad (\text{S10})$$

**Scheme S1.** Synthesis of  $(CA)_2$ 's from double mutants of HCAII and commercially available thiol-selective cross-linkers. A solution of HCAII double mutant in 10mM phosphate buffer at pH 7.4 was treated with aliquots of a solution of crosslinker in DMF.

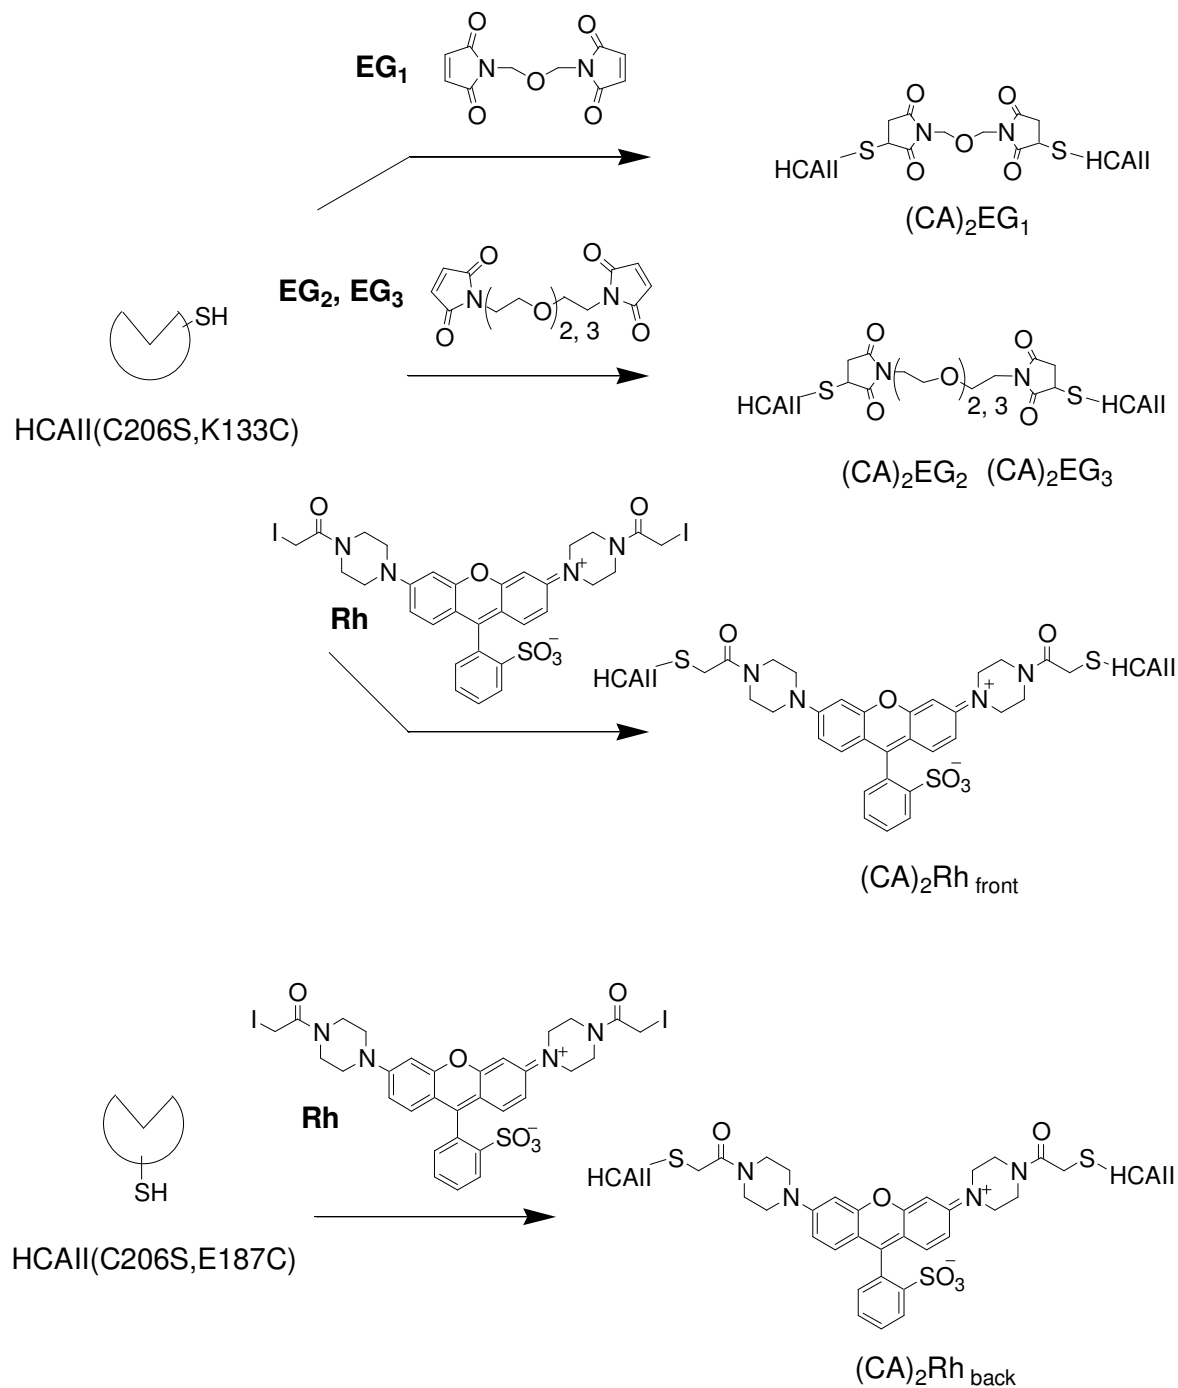

Supplement: NIHMS310242-supplement-1_si_001.pdf [file NIHMS310242-supplement-1_si_001.pdf]
